# Supplementary material for: Intervention for Children with Obesity and Overweight and Motor Delays from Low-Income Families: Fostering Engagement, Motor Development, Self-Perceptions, and Playtime
Source: MDPI journal article supplement (doi:10.3390/ijerph19052545), 2022-02-22
Supplement: s1 [file s1]

*Supplementary Table S1. Spare Time: Descriptive scores, independent and dependent t-tests & Delta comparisons for MCG and CG*

| Children<br>Spare Time                     | Children with Obesity/Overweight |               |                |                    | Children with Adequate Weight |               |                |                   |
|--------------------------------------------|----------------------------------|---------------|----------------|--------------------|-------------------------------|---------------|----------------|-------------------|
|                                            | M(SD)                            |               | Between groups |                    | M(SD)                         |               | Between groups |                   |
|                                            | MCG                              | CG            | <i>p</i>       | Cohen's D          | MCG                           | CG            | <i>p</i>       | Cohen's D         |
| <b>Daily time playing (minutes)</b>        |                                  |               |                |                    |                               |               |                |                   |
| Pre                                        | 140.00(28.82)                    | 138.95(28.65) | 1.00           | .04                | 141.82(30.27)                 | 155.29(30.44) | 1.00           | .47               |
| Post                                       | 177.77(20.25)                    | 137.90(28.00) | < .0001*       | 1.67 <sup>##</sup> | 169.00(24.27)                 | 158.82(29.55) | 1.00           | .74               |
| Within group <i>p</i>                      | < .0001*                         | 1.00          |                |                    | .016*                         | .332          |                |                   |
| Δ Scores                                   | 37.77(29.53)                     | 1.05(20.00)   | < .0001*       | 1.46 <sup>##</sup> | 27.18(31.34)                  | 3.53(14.55)   | .095           | 1.13 <sup>#</sup> |
| <b>Daily time using computer (minutes)</b> |                                  |               |                |                    |                               |               |                |                   |
| Pre                                        | 97.77(85.99)                     | 88.42(80.91)  | ---            | ---                | 85.45(72.16)                  | 76.00(65.99)  | ---            | ---               |
| Post                                       | 75.55(65.71)                     | 85.26(78.27)  | ---            | ---                | 76.36(60.54)                  | 72.00(60.85)  | ---            | ---               |
| Within group <i>p</i>                      | .001*                            | .331          |                |                    | .598                          | .334          |                |                   |
| Δ Scores                                   | -22.22(29.52)                    | -3.16(13.77)  | .006*          | .91 <sup>#</sup>   | -9.09(55.40)                  | -4.00(15.49)  | .772           | .12               |
| <b>Daily time watching TV (minutes)</b>    |                                  |               |                |                    |                               |               |                |                   |
| Pre                                        | 168.89(23.75)                    | 154.73(30.43) | .546           | .54                | 158.18(30.27)                 | 162.82(28.18) | 1.00           | .17               |
| Post                                       | 133.33(25.42)                    | 161.05(28.65) | .004*          | 1.06 <sup>#</sup>  | 125.45(18.09)                 | 162.35(28.00) | .003*          | 1.55 <sup>#</sup> |
| Within group <i>p</i>                      | < .0001*                         | .163          |                |                    | .006*                         | 1.00          |                |                   |
| Δ Scores                                   | -35.56(30.04)                    | 6.32(18.92)   | < .0001*       | 1.15 <sup>#</sup>  | -32.73(31.33)                 | .47(21.21)    | .010*          | 1.31 <sup>#</sup> |

*Note.* \* Significant result; # large effect size; ## very large effect size; --- statistics were not conducted since the interaction groups x time were non significant

Supplementary Table S2. Perceived Competence: Descriptive scores, independent and dependent t-tests &amp; Delta comparisons for MCG and CG

| PICTORIAL<br>SCALE                 | Children with Obesity/Overweight |             |                |                     | Children with Adequate Weight |             |                |                     |
|------------------------------------|----------------------------------|-------------|----------------|---------------------|-------------------------------|-------------|----------------|---------------------|
|                                    | M(SD)                            |             | Between groups |                     | M(SD)                         |             | Between groups |                     |
|                                    | MCG                              | CG          | <i>p</i>       | Cohen's D           | MCG                           | CG          | <i>p</i>       | Cohen's D           |
| <b>Perceived Social Acceptance</b> |                                  |             |                |                     |                               |             |                |                     |
| Pre                                | 16.26(2.89)                      | 17.74(4.09) | ---            | ---                 | 15.73(3.87)                   | 16.24(3.11) | ---            | ---                 |
| Post                               | 18.85(2.61)                      | 17.47(5.12) | ---            | ---                 | 19.45(2.30)                   | 16.90(4.24) | ---            | ---                 |
| Within group <i>p</i>              | < .0001*                         | .813        |                |                     | .001*                         | .383        |                |                     |
| Δ Scores                           | 2.59(1.69)                       | -.27(4.77)  | .021*          | .72 <sup>#</sup>    | 3.72(2.53)                    | .66(3.42)   | .008*          | 1.00 <sup>##</sup>  |
| <b>Perceived Motor Competence</b>  |                                  |             |                |                     |                               |             |                |                     |
| Pre                                | 18.89(2.65)                      | 19.84(2.24) | .195           | .39                 | 19.73(1.68)                   | 20.43(2.50) | .354           | .32                 |
| Post                               | 21.63(2.00)                      | 20.10(2.73) | .046*          | .67 <sup>#</sup>    | 22.27(1.68)                   | 20.57(1.32) | .010*          | 1.21 <sup>###</sup> |
| Within group <i>p</i>              | < .0001*                         | .617        |                |                     | < .0001*                      | .719        |                |                     |
| Δ Scores                           | 2.74(1.35)                       | .26(2.26)   | < .0001*       | 1.43 <sup>###</sup> | 2.54(1.21)                    | .14(1.80)   | < .0001*       | 1.52 <sup>###</sup> |
| <b>Global Self-Worth</b>           |                                  |             |                |                     |                               |             |                |                     |
| Pre                                | 54.89(5.59)                      | 58.74(5.89) | .032*          | .69 <sup>#</sup>    | 55.09(4.85)                   | 56.24(6.33) | .573           | .20                 |
| Post                               | 62.22(5.15)                      | 59.17(7.37) | .127           | .51                 | 62.63(3.64)                   | 58.00(5.88) | .010*          | .91 <sup>##</sup>   |
| Within group <i>p</i>              | < .0001*                         | .755        |                |                     | < .0001*                      | .201        |                |                     |
| Δ Scores                           | 7.33(2.73)                       | .43(5.79)   | < .0001*       | 1.66 <sup>###</sup> | 7.54(3.24)                    | 1.76(6.12)  | .001*          | 1.12 <sup>##</sup>  |

*Note.* \* Significant result; <sup>#</sup> medium, <sup>##</sup> large, and <sup>###</sup> very large effect sizes; --- statistics were not conducted since the interaction groups x time were non significant

*Supplementary Table S3. BMI, Waist circumference, and TGMD-2: Descriptive scores, independent and dependent t-tests & Delta comparisons for MCG and CG*

| <b>BMI &amp;<br/>TGMD-2</b> | <b>Children with Obesity/Overweight</b> |              |                |                      | <b>Children with Adequate Weight</b> |             |                |                     |
|-----------------------------|-----------------------------------------|--------------|----------------|----------------------|--------------------------------------|-------------|----------------|---------------------|
|                             | M(SD)                                   |              | Between groups |                      | M(SD)                                |             | Between groups |                     |
|                             | MCG                                     | CG           | <i>p</i>       | Cohen's D            | MCG                                  | CG          | <i>p</i>       | Cohen's D           |
| <b>BMI</b>                  |                                         |              |                |                      |                                      |             |                |                     |
| Pre                         | 21.88(3.79)                             | 20.63(3.82)  | 1.00           | .34                  | 15.73(1.27)                          | 15.57(.90)  | 1.00           | .16                 |
| Post                        | 20.45(3.52)                             | 20.06(4.05)  | 1.00           | .11                  | 15.47(1.17)                          | 15.82(.90)  | 1.00           | .36                 |
| Within group <i>p</i>       | < .0001*                                | .032*        |                |                      | .526                                 | .214        |                |                     |
| Δ Scores                    | -1.43(1.60)                             | -.57(1.09)   | .039*          | .61 <sup>#</sup>     | -.26(1.30)                           | .25(.87)    | .267           | .01                 |
| <b>Waist circumference</b>  |                                         |              |                |                      |                                      |             |                |                     |
| Pre                         | 72.30(10.25)                            | 70.29(11.16) | ---            | ---                  | 58.68(3.80)                          | 59.90(4.43) | ---            | ---                 |
| Post                        | 70.42(9.53)                             | 69.66(10.84) | ---            | ---                  | 57.41(2.56)                          | 58.31(3.15) | ---            | ---                 |
| Within group <i>p</i>       | .049*                                   | .271         |                |                      | .453                                 | .271        |                |                     |
| Δ Scores                    | -1.88(4.75)                             | -.63(3.58)   | .313           | .32                  | -1.27(3.62)                          | -1.59(3.67) | .815           | .09                 |
| <b>Locomotor</b>            |                                         |              |                |                      |                                      |             |                |                     |
| Pre                         | 21.62(5.18)                             | 17.58(4.48)  | .042*          | .84                  | 24.00(6.20)                          | 17.85(3.94) | .007*          | 1.32                |
| Post                        | 34.59(4.22)                             | 21.21(6.03)  | < .0001*       | 2.71 <sup>###</sup>  | 35.18(2.40)                          | 21.38(4.62) | < .0001*       | 3.55 <sup>###</sup> |
| Within group <i>p</i>       | < .0001*                                | .019*        |                |                      | < .0001*                             | .003*       |                |                     |
| Δ Scores                    | 12.97(4.51)                             | 3.63(6.15)   | < .0001*       | 1.82 <sup>##</sup>   | 11.18 (6.90)                         | 3.53(4.86)  | .005*          | 1.44 <sup>##</sup>  |
| <b>Object Control</b>       |                                         |              |                |                      |                                      |             |                |                     |
| Pre                         | 18.85(5.28)                             | 18.21(4.31)  | .100           | .13                  | 22.73(7.19)                          | 19.33(4.14) | .466           | .66                 |
| Post                        | 33.63(4.32)                             | 21.31(4.16)  | < .0001*       | 2.96 <sup>###</sup>  | 32.73(4.98)                          | 22.00(4.72) | < .0001*       | 2.30 <sup>###</sup> |
| Within group <i>p</i>       | < .0001*                                | .013*        |                |                      | < .0001*                             | .015*       |                |                     |
| Δ Scores                    | 14.78(5.66)                             | 3.10(4.93)   | < .0001*       | 2.22 <sup>####</sup> | 10.00(4.79)                          | 2.67(4.57)  | < .0001*       | 1.59 <sup>##</sup>  |

*Note.* \* Significant result; <sup>#</sup> medium, <sup>##</sup> very large, and <sup>###</sup> huge effect sizes; --- statistics were not conducted since the interaction groups x time were non significant

*Supplementary Table S4.* Children Motor Engagement within the context: Descriptive scores, independent and dependent t-tests & Delta comparisons for MCG

| Motor Engagement                                                     | Mastery Climate in Context: M(SD) & Statics Results |                        |                    |                |                  |
|----------------------------------------------------------------------|-----------------------------------------------------|------------------------|--------------------|----------------|------------------|
|                                                                      |                                                     | Obesity/<br>Overweight | Adequate<br>Weight | Between groups |                  |
|                                                                      |                                                     |                        |                    | <i>p</i>       | Cohen's D        |
| Appropriate motor engagement:<br>With Success                        | Pre                                                 | .30(.46)               | .54(.82)           | ---            | ---              |
|                                                                      | Post                                                | 5.89(1.97)             | 6.09(1.45)         | ---            | ---              |
|                                                                      | Within group <i>p</i>                               | < .0001*               | < .0001*           |                |                  |
|                                                                      | Δ Scores                                            | 5.59(1.97)             | 5.55(1.37)         | .934           | .03              |
| Appropriate motor engagement:<br>Without Success                     | Pre                                                 | 5.44(2.19)             | 5.82(1.25)         | ---            | ---              |
|                                                                      | Post                                                | 5.04(1.87)             | 4.73(1.62)         | ---            | ---              |
|                                                                      | Within group <i>p</i>                               | .558                   | .119               |                |                  |
|                                                                      | Δ Scores                                            | -.40(3.56)             | -1.09(2.12)        | .472           | .22              |
| Appropriate motor engagement:<br>Moving around stations              | Pre                                                 | .15(.53)               | .0(0)              | .161           | .34              |
|                                                                      | Post                                                | .04(.19)               | .54(1.21)          | .196           | .78              |
|                                                                      | Within group <i>p</i>                               | .185                   | .167               |                |                  |
|                                                                      | Δ Scores                                            | -.11(.42)              | .54(1.21)          | .108           | .60              |
| Non- appropriate motor engagement:<br>Free Playing                   | Pre                                                 | .74(.94)               | .73(1.10)          | ---            | ---              |
|                                                                      | Post                                                | .22(.51)               | .09(.30)           | ---            | ---              |
|                                                                      | Within group <i>p</i>                               | .017*                  | .046*              |                |                  |
|                                                                      | Δ Scores                                            | -.52(1.05)             | -.64(.92)          | .736           | .47              |
| Non-appropriate motor engagement:<br>Changing Tasks                  | Pre                                                 | 1.70(1.03)             | 1.73(1.00)         | ---            | ---              |
|                                                                      | Post                                                | .48(.75)               | .60(.81)           | ---            | ---              |
|                                                                      | Within group <i>p</i>                               | < .0001*               | .010*              |                |                  |
|                                                                      | Δ Scores                                            | -1.22(1.39)            | -1.13(1.14)        | .766           | .10              |
| Non-engage in motor tasks:<br>Organizing equipment & Instruction     | Pre                                                 | 1.30(1.14)             | 1.09(1.04)         | ---            | ---              |
|                                                                      | Post                                                | .15(.36)               | .18(.60)           | ---            | ---              |
|                                                                      | Within group <i>p</i>                               | < .0001*               | .033*              |                |                  |
|                                                                      | Δ Scores                                            | -1.15(1.29)            | -.91(1.22)         | .597           | .19              |
| Non- engage in motor tasks & inappropriate behavior:<br>Distractions | Pre                                                 | 2.37(1.52)             | 1.18(1.08)         | .012*          | .87 <sup>#</sup> |
|                                                                      | Post                                                | .18(.39)               | .09(.30)           | .434           | .25              |
|                                                                      | Within group <i>p</i>                               | < .0001*               | .003*              |                |                  |
|                                                                      | Δ Scores                                            | -2.19(1.47)            | -1.09(.94)         | .011*          | .83 <sup>#</sup> |
| Non-engage in motor tasks & inappropriate behavior:<br>Conflicts     | Pre                                                 | .22(.70)               | .77(.90)           | ---            | ---              |
|                                                                      | Post                                                | 0(0)                   | .09(.30)           | ---            | ---              |
|                                                                      | Within group <i>p</i>                               | .110                   | .026*              |                |                  |
|                                                                      | Δ Scores                                            | -.22(.70)              | -.68(.81)          | .156           | .59              |

*Note.* \* Significant result; <sup>#</sup> large effect size; --- statistics were not conducted since the interaction groups x time were non significant.
